# Supplementary material for: Accuracy of Pulse Wave Velocity Predicting Cardiovascular and All-Cause Mortality. A Systematic Review and Meta-Analysis
Source: MDPI journal article supplement (doi:10.3390/jcm9072080), 2020-07-02
Supplement: s1 [file s1]

**Table S1.** Quality of studies assessed by the QUIPS tool.

| <b>RISK OF BIAS</b>                  |                                     |                                 |                                                   |                                     |                                   |                                                                 |
|--------------------------------------|-------------------------------------|---------------------------------|---------------------------------------------------|-------------------------------------|-----------------------------------|-----------------------------------------------------------------|
|                                      | <b>Study<br/>Participatio<br/>n</b> | <b>Study<br/>Attritio<br/>n</b> | <b>Prognostic<br/>Factor<br/>Measureme<br/>nt</b> | <b>Outcome<br/>Measureme<br/>nt</b> | <b>Study<br/>Confoundin<br/>g</b> | <b>Statistica<br/>l<br/>Analysis<br/>and<br/>Reportin<br/>g</b> |
| <b>ADRAGÃO<br/>ET AL 2008</b>        | Moderate                            | Low                             | Low                                               | Low                                 | Moderate                          | Low                                                             |
| <b>AVRAMOS<br/>KI ET AL<br/>2013</b> | Low                                 | Low                             | Low                                               | Low                                 | Moderate                          | Low                                                             |
| <b>BLACHER<br/>ET AL 1999</b>        | Low                                 | Low                             | Low                                               | Low                                 | Moderate                          | Low                                                             |
| <b>KAWAI ET<br/>AL 2012</b>          | Moderate                            | Moderate                        | Low                                               | Low                                 | Moderate                          | Low                                                             |
| <b>LONDON<br/>ET AL 2001</b>         | Moderate                            | Low                             | Low                                               | Low                                 | Moderate                          | Low                                                             |
| <b>MIYANO ET<br/>AL 2010</b>         | Moderate                            | Low                             | Low                                               | Low                                 | Low                               | Low                                                             |
| <b>PANNIER<br/>ET AL 2005</b>        | Moderate                            | Low                             | Low                                               | Low                                 | Moderate                          | Low                                                             |
| <b>SEO ET AL<br/>2014</b>            | Low                                 | Moderate                        | Low                                               | Low                                 | Moderate                          | Low                                                             |
| <b>SHOKAWA<br/>ET AL 2005</b>        | Low                                 | Low                             | Low                                               | Low                                 | Low                               | Low                                                             |
