# Supplementary material for: Accuracy of Pulse Wave Velocity Predicting Cardiovascular and All-Cause Mortality. A Systematic Review and Meta-Analysis
Source: MDPI journal article supplement (doi:10.3390/jcm9072080), 2020-07-02
Supplement: s1 [file s1]

**Table S2.** Pooled accuracy parameters in the prediction of mortality (PWV, combining baPWV and cfPWV).

| .                          | Sensitivity (%)     | Specificity (%)     | PLR              | NLR              | dOR               | AUC                 |
|----------------------------|---------------------|---------------------|------------------|------------------|-------------------|---------------------|
| <b>All-cause mortality</b> | 75.80 (65.00–88.40) | 65.80 (61.90–69.90) | 2.29 (0.81–6.43) | 0.37 (0.13–1.05) | 6.07 (4.28–11.14) | 0.740 (0.710–0.780) |
| <b>CV mortality</b>        | 83.50 (72.20–96.70) | 66.90 (63.60–70.50) | 2.55 (1.02–6.42) | 0.20 (0.08–0.53) | 7.47 (4.28–16.61) | 0.780 (0.750–0.820) |

Values in parentheses are 95% confidence intervals. CV: cardiovascular, PLR: positive likelihood ratio, NLR: negative likelihood ratio, dOR: diagnostic odds ratio, AUC: Area under curve.
